# Supplementary material
Source: PubMed Central journal article supplement (PMC1266088)

Hoechst

pSer and pThr

**A** Colon Tumor CIP Pretreated *RbMI/MI xp53-/-*

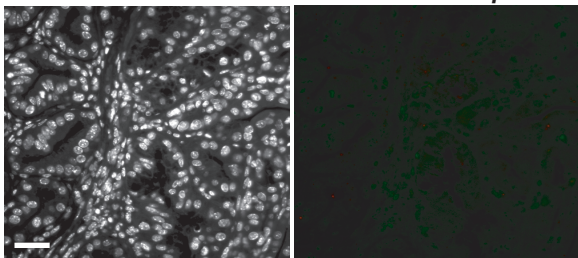

**B** Teratoma *Rb+/+ xp53-/-*

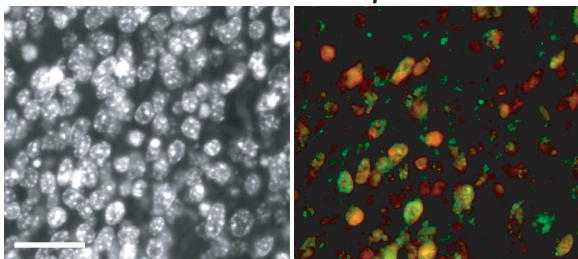

**C** Teratoma *RbMI/MI xp53-/-*

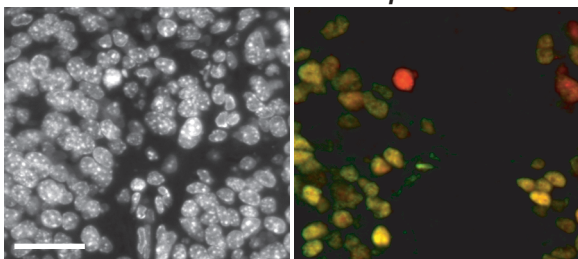

**D** Normal small intestine *RbMI/MI xp53-/-*

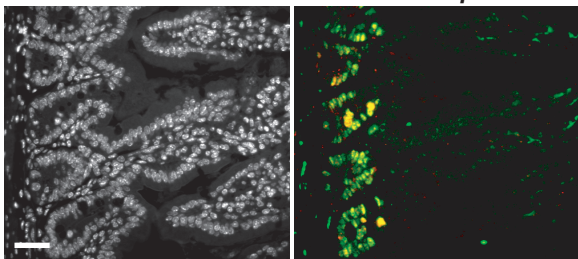

Supplement: pnas_0503925102_2.pdf [file pnas_0503925102_2.pdf]
