# Supplementary material
Source: PubMed Central journal article supplement (PMC1266088)

*Rb*<sup>+/+</sup> *xp53*<sup>-/-</sup>

Normal Colon

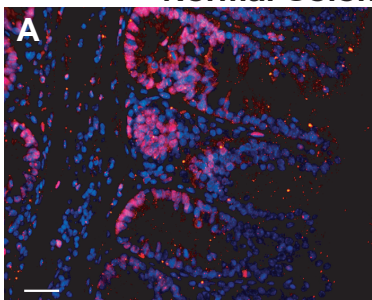

*Rb*<sup>MI/MI</sup> *xp53*<sup>-/-</sup>

Normal Colon PCNA/Hoechst

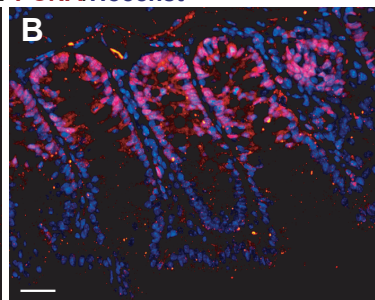

Colon Tumor

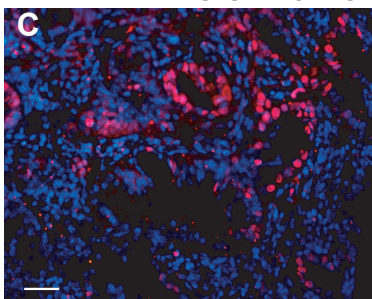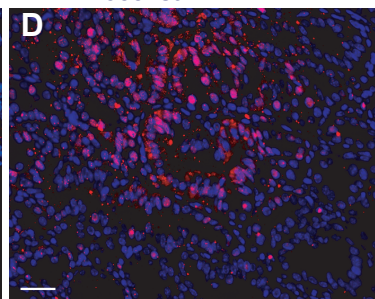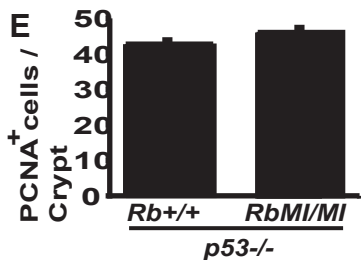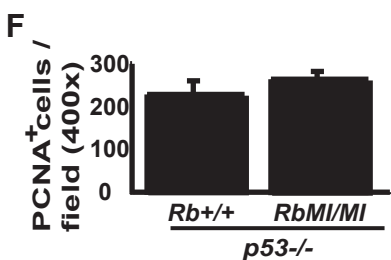

*Rb*<sup>+/+</sup> *xp53*<sup>-/-</sup>

Normal Colon

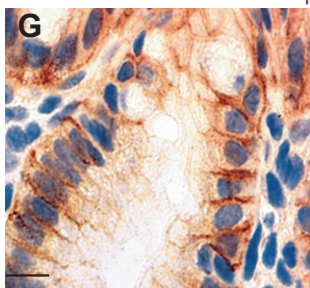

*Rb*<sup>MI/MI</sup> *xp53*<sup>-/-</sup>

Normal Colon  $\beta$ -catenin/ Hematoxylin

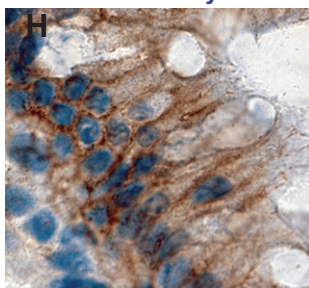

Colon Tumor

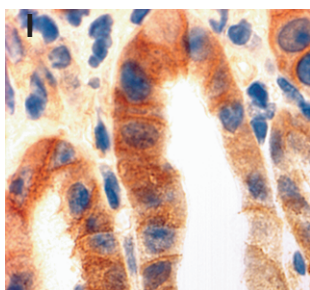

Colon Tumor  $\beta$ -catenin/ Hematoxylin

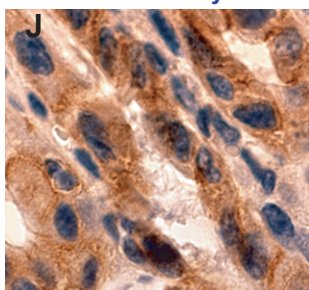

Supplement: pnas_0503925102_3.pdf [file pnas_0503925102_3.pdf]
