# Supplementary material
Source: PubMed Central journal article supplement (PMC1266088)

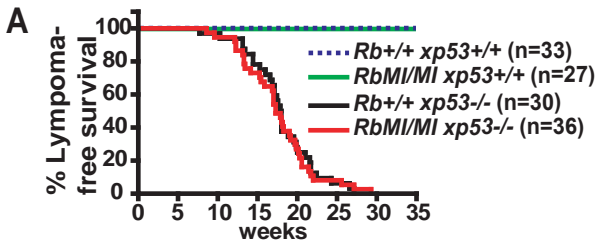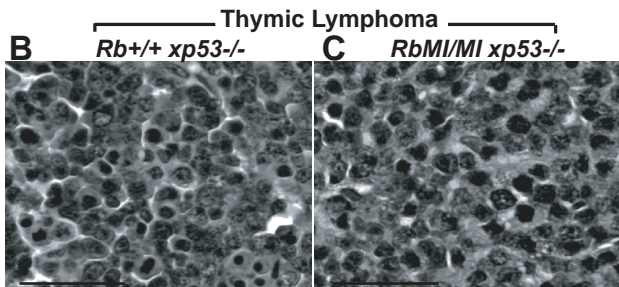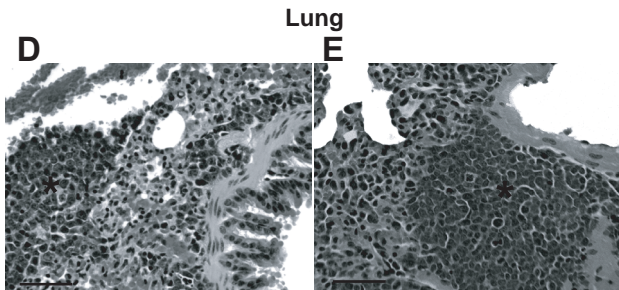

Supplement: pnas_0503925102_1.pdf [file pnas_0503925102_1.pdf]
